# Supplementary material for: Emerging Roles of Plant DNA-Binding With One Finger Transcription Factors in Various Hormone and Stress Signaling Pathways
Source: PubMed Central journal article supplement (PMC9165642; doi:10.3389/fpls.2022.844201), 2022-05-13
Supplement: Image_1.pdf [file Image_1.pdf]

0.01

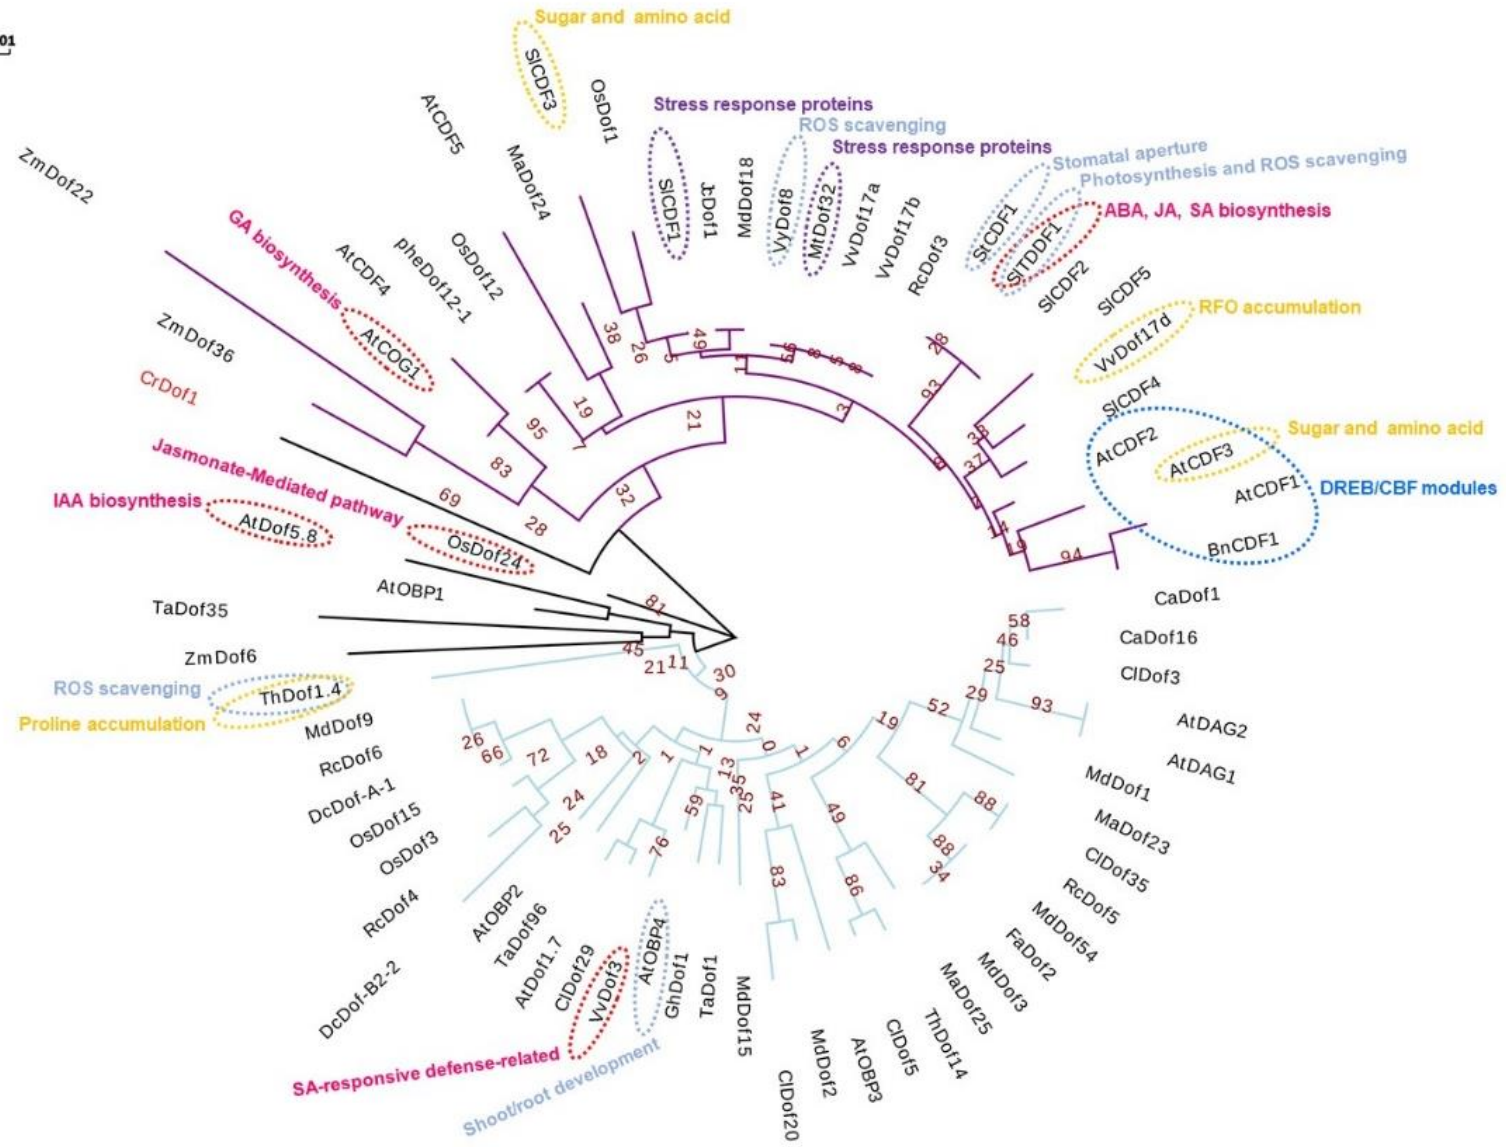

**Figure S1** Neighbour-joining phylogenetic tree of selected stress- and hormone-related plant Dof transcription factors (Tables 1) with *C. reinhardtii* CrDOF1 as outgroup Moreno-Risueno et al. (2007). The physiological function of Dof transcription factor are generally classified into ROS scavenging and others (lightblue), production of compatible solutes (orange), hormone synthesis and signaling (pink), stress response proteins (light purple) and stress-response TFs (blue) and proteins (light purple). The optimal tree with the sum of branch length = 3.47419992 is shown. The tree is drawn to scale, with scale bars representing branch lengths (number of substitutions per site). The analysis involved 69 amino acid sequences. All positions containing gaps and missing data were eliminated. There were a total of 49 positions in the final dataset. Evolutionary analyses were conducted in MEGA7 with Neighbour-joining method and 1000 bootstrap test replicates. Concordantly, other studies encompassing a wider range of plants such as sorghum, rice, and grapes, among others also showed some clusters in common with our analysis (Kushwaha et al. 2011; Noguero et al. 2013). Mention here that most hormone- and stress-related Dofs fall within 3 groups (of 6 total) according to the nomenclature of maybe Noguero et al. (2013).

Dof protein seq use in Fig. S1

>pheDof12-1

MGACRAAAGGGDCLIKLFGKTINVPDAGDGDVDKDLQHSGSSTTEPKVQENIPQDSTGSPPOPEV  
ADTEDSSAVKNSEDRQQQGGDTANQKEKLLKPKDKILPCPRCSSMDTKFCYNNYNNINQPRHFCKN  
CQRYWTAGGAMRNVPVGAGRRKSKSASAASHFLQRVRAALPDDPLYTPVKTNGTVLSFSSNTSTLD  
LTEQMKHLKEKQIPITQIKNTDDPSIRSCAEGLAGEDSNQVNLKEKVTADKSANVAQHPCMNGGT  
MWPFCAPPAYYTSSIAIPFYPAAYWGCMPGAWNTPWPPQSQSQSGSSPSAASPVSTMSNC  
FKSRKHPRDGDDEEGDAKGNKVVVWPKTVRIDDADEVARSSIWSLIGIKGDKVGTDDGRGCKLAGVFE  
PKGEAKTATHTVINSPLFLQGNPAALSRAVTFQEGS

>SICDF1

MREVKEPEIKLFGKKIVLPENGMILPVIVTGEDSDVGKMSASEVVTADESSTGSDRDPCLV  
DKEGNSSQQDESDDGSEYEKDEADKDRMTRELSEAKLEEKDQNLMMEESENKSPSENK  
TKTHTIDDDSPVTKSSKTEDDQNDASNSQQKTLKPKDKILPCPRCNSMDTKFCYNNYNNVN  
QPRHFCKSCQRYWTAGGTMRNVPVGAGRRKNKNSASHCRHIMISEALEAARIDPPNGFSH  
PVFKPNGTVLSFGPDPLCDSMASVLNLAENKTPNGIRNGLYRPENPSGIGGENGDCCSSG  
SSVTTNSMAEGVKNCPEAVMQTINAFPSVPCLPGVPWPIPYAAVFPFAISPAGYPMFP  
CPPPYWNCNVPGPWSLPWLTPPSPTANQKGSVSAPNSPLGKHSRDGELLKPNNPEGQKN  
SEGSVLVPKTLRIDDPDEAAKSSIWSTLGIKYDSVSRGGLFKSLQPKNSEKDHPPTTSPSLQ  
ANPAAFSRSLSFQERV\*

>SICDF2

MSEVRDPSIKLFGKTIGMTQQETNCVYLHDDHTTSSPLSIDDEKINLEGEVTQSKQVDELVD  
PAADSSIEPETSSGISDDIKMQDADKETLSSKSVVEEDSSEEKALKKPKDKLIPPCRCNSMETK  
FCYNNYNNVNQPRYFCKNCQRYWTAGGTMRNVPVGSRRKNKSSSISNYPLQAGRVEAA  
AHGMHLPASRTNGTVLTFGSDKPLCDMSVSNLAENSHNMHRNEYHGSEQRMPITIGNDQ  
SNGSCSTASSVTDKESAGTHDLANWSNFQFPFPQVPYFQGAPWPYSGFPVSFYPAAPY  
WGCTVSNPWNVPWLSSNQSVHNNSPTSPTLGKHSRDESKLDPSQSRRRDRTLQDREGER  
CVLIPKTLRIHDPNEAAKSSIWSTLGIKIDSTRGTMLESAFNPKADHRNRELDTSFALQA  
NPAALSRSRSLHFRESTR\*

>SICDF3

MTCDEIKLFGKILPVVSGVGRGLSGSDGVIYDGNRNGSDLDRCLGSKASSVEKDEGSE  
YEKQEAEKDNIETGELSEAKSEEGDQNMIEESENPKTPSESESSPKSSTEEDPQAVKSSKT  
ENEPTNVTNSEQNNLKKPKDKILPCPRCNSLDTKFCYNNNNNVNQPFRHFCRSCQRYWTAGG  
TMRNLVPGAGRRKNKNLASQYRNISIPEGLLAAGIESPNGLIHHPLFKPNGTILSFGPDPLC  
EPMASALNQAERKRVSTGIQNGSHKSEVKNSSCKGGDSDGDECCRGINIPTPNMMVEEGKGE  
PHKAVMHSINGIPSPVCLHGVPWPFWNAAVPVAICPIPFMPFFPTPYWNCVPPWSN  
PWLSPPLRAANEKTSKSDPTSSLGKHSREGDLLKPSNPGGKEQSEQKYSEGSILVPKTLRI  
DDPDEAAKSSIWSTLGIKYDSTNRGEFFKALQPKSNDKHNKANTFPVLHTNPAALSRSITFQ  
QGA\*

>SICDF4

MTDPAIKLFGRTIQLPDIPDSSGAQGGDSLPGDNNGEEDDEADKDDFGGNLDDDEEEMEILT  
GKELQDQNSEPTKDSIKELPVDNDCSTRPSKSEEEQGEASNSQEKILKPKDKIIPPCRCNS  
METKFCYFNNYNNVNQPRHFCKSCQRYWTAGGTMRNVPVGAGRRKNKNSIPHYRQISVSET  
LSNAQTDYPNGIQQPILAFGSPTPLCESMASVLNIADKTMHNCSQNGFHKPQEPGVPVSYV  
VGDNGDDHSRRSSVTSANSEDEVNKTVPDLLKKNCHNFPPYMTYYPGAPWPYPCSPVPW  
NSAIPPPGYCPPGFMPFYPAASYWGYTVAGSWNVPMSPATVSLIQTPTTSGPISPALGK

HSRDENIQKPLSSMEEPSNESNPEKCLWVPKTLRIDDPGEAAKSSIWATLGIKHDTVDSVGG  
SPFSAFQPKNDDNNRVSENSTVLQANPAALSRSVNFNESL\*

>SICDF5

MSEAIKDPKAIKLFGWTIQLPDFPAPAPEDSSFLAGEVEQELKGLYDDCIDDNEHLTTEDSQ  
DQNPIQQRCDIINYESSTAKTSKSKKEEHGETSNSHERNLKKEKTLPCPRCNSMETKFCYF  
NNYNASQPRHFCKNCQRYWTAGGTMRNVPVAGARRKHKNSVLHYSHVSVSEALSNVRTN  
FPTETQHPPLTLNGTILSFDTDKPVSESMVSVLNVADKGMQNCSGNGFQKYKELRIQAGDN  
GDDHSDGSSVTAISSKSDNGLPNTPRKNYNSFPTHLPCTGAPWPYIWSSVHCRNAVPP  
PGYSLPGIPMSFIPATTYWGCTIPGSWNVPWMSPTASHNQMPPLTPDPNSPTSRRKHSRDE  
NVLKSTGTEEEQRKESDPGKRLWFPKTLRIDDPGEAAKSPIWATLGIKHEVVNSVGGGLLS  
DFLPKNDERSCVSENSTLLQVNPAAAMSRSLNFNESS

>DcDof-A-1

LPPPTGVLQSSSTTTTTTNPKPSSSENSNPLRCPRCDSSNTKFCYNNYNLTQPRHFCKTCRRYWTGK  
GALRNVPPIGGGCRKNNKANISHAISSALEKPTTGKYIRSHILTSENMLQGKASSAYLGGSDHGLSTHS  
LLWTSPQTSHLLALLRSNQAQNPDPNYDCSNIINSVKEEGPFLNGSGGFRLDPYGNNLNNQQQSG  
GFIGQNLNNQDQVCDQRASFKAENYSDNYAAANLLMGSHTPSANCSDILESTPVLGGGHQLV  
GCWNNASLSRPELPTTDGAYH

>DcDof-B2-2

MMAQDNLNPNPPDDSSGNSQKAACRPAEAPRCPRCDSPNTKFCYNNYSLSQPRYFCKTCRRYW  
TKGGALRNPIPIGGGCRKNNKMSSKSCSRFASDSMDSGSSSYLDHLGGFKFSNIGLSSGMNFQTLDT  
NLPRTFSPVQYQQLSTNSSFGNFSRTLSSPCFLENQTGSSSGSAFMGLNPLSSSGIKQVHGSAQL  
LQDHDLDIKNNDVASSIESLSSINQDLHWKLQQQLGMMMFGREENSITDQKEVLRNTSVIMPPPM  
NVVPKQPQPILFENLEISSRVKDQDVHQGVGSSSGTSGTEWLLDHNAAQPNITAITGMNQAWGNF  
YQYTPLP

>JcDof1

MQENNNNSNSGSKDSAIFGKIKPLKSDSDPPAISCDLPSWERVEEGEAEKTEKDSSAGNVKETSQE  
DDTEESSDQETNENPKTPSISEESAISKISETEKEQNDPANTTTQEKALKKPKILPCPRCNSMDTKFCY  
YNNYNVNQPRHFCKACQRYWTAGGTMRNVPVAGARRKKNKHSASHYRHITISEALQAARIEAPNGT  
HNPALKTNGRVLFSGLDTPCDSMASVLNLADQNVNLGATRNGFHNLEGQKKILGSCCKGRENGDD  
CSSASSVTVSNSVEEGKICQQEHIMQNVNGFASPIQCLPGVPWPYPWNSALPPPFCPPGYPMF  
YPPFGNYGWNIPLLSPQSSSSSTNQKAQSSPNSPTLGKHSRDGDALKQDDLEKEESPKRKNKGCVLVP  
KTLRIDDPTEAAKSSIWATLGIKNETYSSGGLFKSFQSKNNEKNHVNKTSPVLHANPAALSRVNFNESS

>ThDof14

MSEDGGFDSSSSPTSHDMLTCSRPLIERRLRPPRDQSLKCPRESTHTKFCYNNYSLSQPRYFCKTCR  
RYWTKGGTLRNIPVGGGCRKNNKPTTTNNGGNGGGGNSKSSSSSSVQSLSSNDHLHDQHNPM  
SLLLQNSIGLSSMMPSGNNNPTELQLSFPHHDQATFSHFSNLIGVHGGLGGDIGFMESKYNAMLEN  
NNNNNNNNNNNGNSCSNIPSRPIDFVENYKLDALVGHDEVIRGHDFLNGAAGTTSVGGGFGNIM  
GGINGVDPLSSTGHGHDLSGCGDYSGFCSFGLASMDHGSNNTNAGGYGAFLDQRLMLPFDGND  
HREMPNSIDVKPNATKLLSLQWQDQHQCSDDRHNNNINGGTSASKGSFGYNNVGLSSWSGT  
GMISGYGPPTTNPLV

>TaDof1

MQDFQSIPGLAGRLFGGAAAADIRRVQGPASRCGVFSQAASAQPEAAVKCPRCESTNTKFCYNNY  
NLSQPRHFCKSCRRYWTGGVLRNVPVGGGCRKAKRSSSSASAPSTPAATDAKSQRASASSSSRSN  
SGSGSASPTAAAEETTTTTETEPPTPSSNSNSNAVSFANRMTNYPFAADVPLAIFADQAAALAS

LFAPPPPPPLPVFSFAEPKMEEAIGSLLLPGQEASQEPEEPTCTSTVADMAPFMSLDAGIFELGDASPA  
DYWNGGSCWTDVQDPSVYLP

>VyDof8

MAEAKDPAIKLFGKTIPLPEVATAAAGNDSPSGATVGGGGEDWVDQNRATNSSPEEDCVRAGEEGR  
EVDKDTSGGKVTDRQEDGARSSTSEFTDPDANSVGNENPKTPSADKETATLKCSKNEEQSETSIS  
QEKTLKKPKILPCPRCNSMDTKFCYNNYNVNQPRHFCKNCQRYWTAGGTMRNVPVGAGRRKN  
KNSTSHYRHITVSEALQSARTDVPNGIHHPALKTNGTVLTFGSDTPLCESMASVLNLAEKTMRNCTP  
NGFHKPEKLRIPVYGGGENGDDHLSKSSVTASNSKEEAGKTALPDQVMRNCHAFPPQIPCFPGAP  
WPYPWNSAQWSPPVPAIPPVPPPAFCPSGFPMPFYPAAYWGCTVPGAWNIPWVPQPSALNHTA  
PSSGPNSTLGKHSRDENMLKASNFGEEELQKENNSERCLWIPKTLRIDDPGEAARSSIWATLGIKND  
KADPISGGRLFKSFQSKADEKNHIAETSPVLQANPAALSRLNFHES

>ZmDof36

MLPPHVEMPTTRAAGIKLFGKVIITHYQQQQQPPQVVRHAGAAPASSGRGSGGGPGPDLL  
EEVARARAAAAEARLPCPRCLSRDTKFCYFNNYNVNQPRHFCCRACHRYWTAGGAIRNVPV  
GSGRRKNRPVLLPPPPPPPHAATATTTGSSATISADDSNDRRRSASGSPPPVFTSAFTAP  
YYLGSPAQFATSSPAYAAGAAGPPGTAGQCLWLVAATTTTDRSAATETALF

>ZmDof22

MAANLPDADAAGFKLFGKVIQPPDAQKRGADGDDPTPQTALPPPPPPPPPPPPQAPAA  
GGPGAELPCPRCGSRETKFCYFNNYNVRQPRHLCRACRRYWTAGGALRRVASASPGRRR  
PRPTARSAPVAAAASSAPAAAEEDSFGGQKDAAGLLCDRERVQFGRQSKRPPQLHARVTE  
QCRCRSSKTKCFITASNELVRVLNPTGVLNPSAASLLAPRCAALRAGS

>ZmDof6

MPSSFLTSSSSASSHLSYLIPARAAPPPPFAMGQGYGATSGGGVANATSAAAAPPPPRQ  
GASRNAGAGHPPLPRPPPRQCPRCRSANTKFCYNNYSREQPRYLCKACRRHWTEGGTLR  
DVPVGGGRKNRRGAKGGAAGSASAAAAAPAQQGGNVLGADTFPGDLLRQLVQFQPDAA  
VGGGGYAILSAWHQMVAATAPPPPPPGTGGDVSSLGLGAAGAGAGAEANCVALQYWSED  
GMPGLDGAC

>MtDof32

MFMWLKFIFTSVALQTFNLNGSTLSHSFTTCHFSFLSYNNLLQHLFFSFYNNRKSFHLFLATKMLETK  
DSAIKLFGKTIPILEVRVGDVVESIDDDHHHFTSNSSNESRNNKDEQDQEIEKNTLGEKPSDEKNEGD  
IPIQSTEEFTNPDAASRTDEESITVSTERKAATLKTSKTEEQDETSNSQDKILKKPKIVPCPRCNSMDT  
KFCYNNYNVNQPRHFCKNCQRYWTAGGTMRNVPVGAGRRKNKSSSSHYRQITVSEATLQNSRIH  
PSVKCNGTILTFGSNSPVCEMASVLKHADKTMQNYTRNGYHKHEELRICVPHTSEEQGEDQSNKSS  
VTSTKSTEGATTNVSQEQAMWNDHSFPPQGGYFPHGTPWHLNPNVQMSSPIPPPAFCPPGFSM  
PFYPATTYWGCTMPSAWNIPRQAQPSSPNGANHDSTPNSTLGKHSREDNMLKSSEGDGKKEISEE  
KSLWFPKTLRIDDSEEAE

KSSFWTTLGIKNNNADSVPPRRLFQAFPSKCDEKNHLVQVSSVLQANPAALSRLHFHETS

>MdDof54

MFTDPTVKQMLQCPPSGQGQFMMEMKRPWNKSHIEVAPNCPRCASSNTKFCYNNYSLSQPRY  
FCKGCRRYWTGGSLRNPVGGGCRKNRRGKATRLSQTDSASLSYFQHNNSSSGTEDDPGNNQP  
GGSNASDIDLAVFAKFLNHNSTTPDDHYHDPNLVISSALNDHDGSQNSSKAGDLVEAVDHILLE  
GHQQSQEENVQTFMGINHNDMNIHEFELQGLPVDEDQVVDVFWSDDATMSSLA  
SSTASFTWQPMVHLQELDCSLPSSDDQMKISTNLCGDNWSTFDGSGFEVFSRS

>GhDof1

MQDIHSIKGGCIFGGGGGGG GGGGGGDKRLRSHHHHNHQALKCPRCDSLNTKFCYNNYN  
LSQPRHFCKSCRRYWTGGI LRNVVGGGCRKAKRTTKASSETTAVAASALPPPEQQHC  
DQRKANSHSSSESSLTATNSNVAVPNQNNNYSSAAGTAE AVTSHSNLIDVSEPKFYGNP  
NNLGLLEPGLLEQGSDCGIFPEIGSFTSLIT SSNNETMSFG FDKVLNGQALEQGQWQQQH  
KMMRMGGDEI NGLLDQTVQVELSNMHSRSDNGFGALDWQGNEDQGLFDLPNDVDKTYWS  
QTQWTDQDHH GLYLP

>MdDof1

MKSKNQDFGIMRSIKRNPLSLRMLMIPQKMKNKNEFSKQNTKIPHRITQT  
ALCSDILGGIVKTRTFLYFSPHRQSHKGSGEPEKPMEDHDMGSNGCTRSV  
LEKRARPQEQLNCPRCNSTNTKFCYNNYSLTQPRYFCKTCRRYWTEGGT  
LRNVVGGGSRKNKSTSSSVSSKITIPDLNPPTLSHFSSSHQNPRVTH  
EGQDLNLGFNAIDAHYHGTTMENNNTNSSSXPNLSAMELLRTGIASRGV  
NSYIPTQNPMDHHSNTLYPPSSAGFSLQEYKPTNLGFCVDGLGNRYGGDD  
HGTVNGGRILFPFGDHHLKQISSTAXHHEVLDHQQKNGQGNPTGYWNGLL  
GGGSW

>MdDof2

MVFSSVPVYLDPPNWQQQTNNHHQQGGGSDQNNPQLPLVPSSEARCTSV  
GGGGLGSIKPGSMCDRARMALPQPETALKCPRCESTNTKFCYFNNYNLS  
QPRHFCKTCRRYWTRGGALRSVPVGGGCRRNKRSKGGNSSRSKSPGAAGN  
SSSSTVNSSNSCSASDNIIHLTHPPPHQLPFLPSLHLLPDYGSMDMLG  
LNNFGINQPGDVEFQHHQYGSDFGARPNI LGMNNMSSTEHWRSLLQQQ  
FPNFLVNLGQPTSTTHGLYQFDGGDHQNVVQLPISKPLDHSAGNGVTTTQ  
MANVKMEQNQALNLSRNFLGSLGNDHQYWGSSTTGTGGNAWTDLSGFTTS  
SSTSHLL\*

>OsDof1

MDDLAAASPPHPPPPPESHVPPPPQTPEKDSCEDTGDMRISEKPTDQELDADQMNSS  
SFNSSEECENQTPSNDEMTGSESKSEAAQTEGGGSSEKVLKPKDKILPCPRCNSMDTKF  
CYNNYNINQPRHFCKSCQRYWTAGGSMRNLVPGAGRRKSKSSTANYRSILITGSNLAAP  
AGDAPLYQLSIKGDQTATAVKFAPDSPLCNSMASVLKIGEQSNAKPTSTAQPRNGETQT  
CPASGTTSDSPRNEPVGAVSGHQNGIVGHSGVPPMHPIPCFPFPFVYPWSPA WNGIPA  
MAPPVCTAPAEPANSSDNGSTASVQWSMPPVMPVPGYFPVIPSSVWPFISWPNGAWSSP  
WIQPNCSVSASSPTSTSTCSDNGSPVLGKHSRDSKPGDDKAENLWIPKTLRIDDPDEA  
AKSSIWTTLGIPEGDRSMFRSFQSKPESREQISGAARVLQANPAALSRSQSFQETT\*

>OsDof15

MIQELLGGTTMDQLKGASALNHASLPVVLQPIVSNPSPTSSSSTSSRSSAQATQQRSSSA  
TSSPHGQGQGGGAAEQAPLRCPRCNSNTKFCYNNYNLTQPRHFCKTCRRYWTGGALR  
NVPIGGGCRKPRMPAPVAKPPMCKAAPPLGLGGGPVSWASGQQAATAHLMALLNSARG  
VQGHGGSNVHRLGLDIMGHLQILPGAPNGAGAGTAASLWPQSAPRPVTPPPPHMDSQLG  
MGTLGHHDLVSSLGLKLPSSASSSPAASYSDQLHAVVSNAGRPQAPYDVATASLPCTTA  
VTSLPSALSSVAAAPTSNTVGM DLPPVSLAAPEMQYWNGPAAMSVWPDLPNGAFP\*

>OsDof24

MQEQQPETGRRPAQQFATVDLRRPKGYAAPATPQPGSAATAAAAAGPAATAAAAAAAGEG  
DPCPRCESRDTKFCYNNYNNTSQPRHFCKCRRYWTGGTLRNVPVGGGTRKKS SSSSSS  
SSSSSAAAAAPAAKRQKTSKKRRVTTPELAATPVLTEAAADSAAKTTTEATSEKTTT

STTTTTPPAPDTTSEITTELVPVEEDSFTDLLQPDSA AVTLGLDFSDYPSITKSLADP

DLHFEWPPPAFDMASYWPAGAGFADPDPTAVFLNLP\*

>ThDof1.4

MGLSSKQVSSDGQDWNQSF LQATSTNTTATTISSIDPIASTMEVPNQQLTPTKRLQNQVQAEPLRC  
PRCDSTNTKFCYNNYNNKSQPRHLCKTCKRHWT KGGTLRNV PAGGGRKNKRVRTSNTSSSSLAGITT  
PSATKVTPVTSASTATATKSTLSNIMKQHIEGHGFS LPHYSKGM MIKSPATSLLGEGLFNNSNLNKAT  
NLNEMLLDATTLSLPIDRSIDLHQFPYTNLSTSSACSKTSM PYSFQSPISLYAYAVDHQPSSTSALEETV  
TGGLETSISGSSGSDQHQPWTTMNNTSRFSSSTGAIGMPTS NWGWDDIDKFASVDIAIPWDDDDVEI  
NP

>TaDof35

MASASALLPAADSAPDAAEQEQPLAQVSLCSLLT LSQSGQQGGDQKGAASKKNDHGHHSQ  
QQQPKLECPRCSSDTKFCYNNYSTAQPRHYCRACRRY WTHGGTLRKVPVGGACRRRSRG  
SGKRRRSSAEPHTPSSDSPPPPQPEQQDTLPPLP VFPFLTDGGPIFLPQFDLGLAGFPWT  
TPTATDHLYDGLGAPWGGCDGALAPTGAWDDFGGLEL TWPLAAGN

>TaDof96

MQEFQSIPLAGRLFGGAAESAGLLRRGGAAAAQEEVRCPRCDSANTKFCYNNYNNLSQP  
RHFCKGCRRYWT KGGLLRNV PVGCGCRKPKRKA AAAASSDVEKDASSANSEAKNARS GCSA  
GSSSLTSAASSANTNTVIDAGACASAHSSGGSMPFTGLGPSTFMADAPPLQPPAPMFADQ  
AAAFASLFGTPLPAFSFSAQRKAEDDVAPAVTLTEQPSSASSTADLAPFSARSTGAVTAS  
ASDWPPATVIEAGIFDIAGAVGSDTTSYWNTASWTD PDGTVYLP

>VvDof17a

MLDFKDP AIKLFGKTISLPLNPHLSPTSPPPPPLSSTTSFPDDTSQGLQPPSQDQKPLEGQEFEGKEEDG  
TSRQTSEELKDPTASPGVSENPETPSADKETS KDGEQSEISGSQEKTLKKPKILPCPRCNSMDTKFCY  
NNYNVNQPRHFCKNCQRYWTAGGTMRNVPV GAGRRKNKNSSASQYRHIMVSEALQTARASAAN  
GIHHPALGNNGTVLNFSGDGPLCESVASVLNLADKTQNCM QNGFHKSEQRIPASCGGGENGDDHS  
SITLTNSAEKGNIAGLEPVVKNFQAFSPHVPCFPGASWSYPWNPAQWSSKIPPAFCPPGFPISFY P  
AYWGCTVPGSWNIPCIPTSSSPIHSALATNHNSPTLGKHARDGEVLN PANPGKEDHQKENNPERG  
VWIPKTLRIDDPNEAAKSSIWTTLG IKN DGSNGG SLLKAFQSKGDEKKRIAEMSPVLQANPAALS RSL  
NFHERA

>VvDof17b

MAEAKDPAIKLFGKTIPLPEVATAAAGNDSPSGATVGGGGEDWVDQNRATNSSPEEDCVRAGEEGR  
EVDKDTSGGKVTDRQEDGARSSTSEFTDPDANS GVNENPKTPSADKETATLKCSKNEEEQSET SIS  
QEKTLKKPKILPCPRCNSMDTKFCYNNYNNVNQPRHFCKNCQRYWTAGGTMRNVPV GAGRRKN  
KNSTSHYRHITVSEALQSARTDVPNGIHPALKTNGTVLTFGSDTPLCESMASVLNLA EKTMRNCTP  
NGFHKPEKLRIPVPYGGGENGDDHLSKSSVTASNSKEEAGKTALPDQVMRNCHAFPPQIPCFPGAP  
WPYPWNSAQWSPVPAIPPVPPPAFCPSGFPMPFYPAAA YWGCTVPGAWNIPWVPQPSALNHTA  
PSSGPN SPTLGKHSRDENMLKASNFGEEELQKENNSERCLWIPKTLRIDDPGEAARSSIWATLG IKN  
KADPISGGRLFKSFQSKADEKNHIAETSPVLQANPAALS RSLNFHESS

>VvDof17d

MNGGDLAVSRDPAIKLFGTTIQTQICSNSPQKSLDAPSEITKAEAEDPCAEDSRKPDGSSVSE DGKEE  
QQTQVQMSGLQVHKDQGETNSSAQEKVLKKPKILPCPRCNSLETKFCYFNNYNNVNQPRHFCKNC  
QRYWTAGGTMRNVPV GAGRRKNKHLASQYRQIMVSSDGVPTTVIEASDSSNQILSCGETSTTFRP  
STASGTVLKFGEAPLCKSMETVLSIREQKRCAEMRTVNCGGNGE EPSSCASSVSAPSPENEFPENV  
GHKDRPSLPASRSEIHPQLHQPCYPVPPWAFPWNPGWTVN VAPVAPPQCSSDTVYAPNNSNPNSV

QWCSRPMPLAVPGFCAPTIPLQLVPPSYWGCMPIWGAGTGNISLAGSNDCLSPSSSTNSCSGNASP  
TLGKHSRDAQPAEEQKLEKCVLPKTLRIIDPDEASKSSIWATLGIKPDQKAPISKGGIFKAFEPKSGAKT  
DLSDATQVLEANPAALSRSTFKEST

>StCDF1

MSEVRDPAIKLFGKTIGMTQQETNCVYLHDDHTTSSPLSIDDDKITLEGFTQSKQDDEL  
VDPTADSSIEPETSSGISDDIKMQDADKETLSSKSIEEEDSSEEKALKKPKLIPCPCRCN  
SMETKFCYNNYNNVNVNQPRYFCKNCQRYWTAGGTMRNVVPVGSRRRKNKSSSISNYPLQAGR  
VEAAAHGMHLPALRTNGTVLTFGSDKPLCDSMVSALENSHNMNRNEFHGSERRMPAI  
GNDQSNGTCASTASSVTDKESAGTHDLANWNNFQPFPPQVPYFQGAPWPYSGFPVSFYPA  
TPYWGCTVANPWNVPWLSSDQSSVQNNSTPTLGKHSRDESKIDPSQSRRRDANLQNRE  
GERCVLIPKTLRIHDPNEAAKSSIWSTLGIRNEKIDSARGTMLFSAFNPKADHRNREHDT  
SFALQANPAALSRSLHFRESTQ\*

>CaDof1

MDTANWPQEIVVKPMEEIIGSSKPNNCVERKLVRPQKDQVVCPCRCNSTNTKFCYNNYS  
LSQPRYFCKTCRRYWTEGGSLRNIPVGGSRKNKSSSSNNNNNNNNNSNINHVVINPLM  
KKLPDLIVPLIQHDIEEYPERHFGNRPDNLVLPQHHDQNPRIIEGSDQLNLGFSS  
DFKTITELIQVANYDGGNKDNNNSTNNISTLPPPSESPSAPFSQLPSLNFSLDHHGLGNN  
NVRSGYGGFFPVGLKQVSNASDHVRDQSTNNGYWNMGLGGGGGGSW\*

>CaDof16

MDTSQWPQGIGVVKGVEPSSKAVVLPDQRKPRPQKEQAINCPCRCNSTNTKFCYNNYSLS  
QPRYFCKTCRRYWTEGGSLRNVPVGGSRKNKRSNNNSNNNNSSSSNSSTSSSLSSSK  
KLLSDLANPNDLNLTYNPISATAAVATTSTAGNFSNFSEFMALPLIHPANSTSSFPNNL  
YTSSTGLPNLHDLKSSSLNFSLDGFENGYGSLQGGDQEAKLFFPMDDLKINVSTANDQFE  
ENREQAAADQSNQFWNGMLGGXXXXXXXXXXXXXXXXXXXXXIRGGVYFNIFSVFFKVIF  
TG\*

>CIDof5

MGLTSLQVCMDSDDLQGTINEESGMDSSSLSGDMLSCSRPLTERRLRPQHDQALKCPCRC  
DSTHTKFCYNNYSLSQPRYFCKTCRRYWTGGTLRNIPVGGGCRKNKVVSTTKKSNDDQ  
QQQQQQQPQIQQPISQNHLLHHHHHHHGGPSSSSSLHIHNPTDLHLSFPDQVQFPFH  
NPLIGTTPNFTIGMLETHHHHHQTRPIDFMDTKMEAIVGNNGHYSTNTDHLAMVGGNG  
DHHITAAATNFHGLCSPYGLSLDGNINQMMIPYDQHQTNEPNGMDVKPNTKLLALEWQD  
QGCSEKVESYGYINGIGSSWNGMMNGYGPSTTNPLV

>CIDof29

MQDPSTFQPIKQFPEQEQLKPCRCNSTNTKFCYNNYNSLQPRHFCKNCRRYWTGGAL  
RNIPVGGGTRKNSKRAVAATVKRQPSTSSSSSSTLTNPNPITAPDHNPIGIYGGGLDIPG  
SFSSLLASNGQFGNLLGVDPNQSELKMVELGEFSGSRKSAEEQSTAVPENYLGVLQN  
GDSNCWTGGGSHGWPDLAIFTPGSSYQ

>CIDof35

MVEISPNCPCGSSNTKFCYNNYSLTQPRYFCKGCRRYWTGGSLRNVPVGGGCRKNRR  
PPKPLNLTPSPSNPKFHHSNDGNCHRNRHGLSDHMSPTIDLAAVYANFVNQKADTPETL  
PTANTTSNATGHFSVSGESGGVCGNYCEFSMQEGLGANDYQVAGCFGLENNNDHQVD  
NIEVAARELQLPLPGEDMLGGWGNPMIMVNNHHRLQPTRVEMFGMETQDPNLLSGNWSP  
IDLSNYDTFSRA

>AtCOG1



MATQDSQGKILFGKTIFFNANITQTIKKEEQQQQQPELQATTAVRSPSSDLTAEKRPDK  
IIPCRCCKSMETKFCYFNNYNVNQPRHFCKGCQRYWTAGGALRNVPVGAGRRKSKPPGRV  
GGFAELLGAATGAVDQVELDALLVEEWRAATASHGGFRHDFPVKRLRCYTDGQSC  
>AtDof1.7

MQDLTSAAYYHQSMMMTTAKQNQPELPEQEQLKPCRCDSPTKFCYNNYNLSQPRHFC  
KNCRRYWTKGGALRNIPVGGGTRKSNKRSGSSPSSNLKNQTVAEKPDHHGSGSEEKEERV  
SGQEMNPTRMLYGLPVGDPNGASFSSLLASNMQMGLLVYESGSRWLPGMDLGLGSVRRSD  
DTWTDLAMNRMEKN

>AtCDF5

MSKSRDTEIKLFGRTITSLLDVNCYDPSSLSPVHDVSSDPSKEDSSSSSSSSCSPTIGPIR  
VPVKKSEQESNKFKDPYILSDLNEPPKAVSEISSPRSSKNNCDQQSEITTTTTTTSTTSGE  
KSTALKKPKLIPCRCEANTKFCYNNYNVNQPRYFCRNCQRYWTAGGSMRNVPVGGSG  
RRKNKGWPSSNHYLQVTSEDCDNNSGTILSFGSSESVTETGKHQSGDTAKISADSVSQ  
ENKSYQGFLPPQVMLPNNSSPWYQWSPTGPNASFYVPFYGCTVPIYPTSETSSCLGK  
RSRDQTEGRINDTNTTTTTRARLVSESLRMNIEASKSAVWSKLPTKPEKKTQGFSLFNG  
FDTKGNNSRSSLVSETSHSLQANPAAMSRAMNFRESMQQ

>AtCDF4

MATQDSQGKILFGKTIAFNTRTIKNEEETHPPEQEATIAVRSSSSDLTAEKRPDKIAC  
PRCKSMETKFCYFNNYNVNQPRHFCKGCHRYWTAGGALRNVPVGAGRRKSKPPGRVWGM  
LGDGNGVRQVELINGLLVEEWQHAAAAAHGSFRHDFPMKRLRCYSDGQSC

>AtDAG2

MMNVKPMEQIMIPNNNTHQPNTTSNARPNTILTSNGVSTAGATVSGVSNNNNNTAVVAER  
KARPQEKLNCPRCNSTNTKFCYNNYSLTQPRYFCKGCRRYWTEGGSLRNVPVGGSSRNK  
KRSSSSSSSNIQTIPSSLPDLNPPILFSNQIHNSKSGSSQDLNLLSFPVMQDQHVVH  
MSQFLQMPKMEGNINITHQQQPSSSSSVYSSSSPVSALELLRTGVNVSSRSGINSSFMP  
SGSMMDSNVLYTSSGFPTMVDYKPSNLSFSTDHQGLGHNSNNRSEALHSDHHQQGRVLF  
PFGDQMKELSSSITQEVHDHDDNQQQKSHGNNNNNNNSSPNNGYWSGMFSTTGGSSW

>AtCDF3

MMMETRDPAILFGMKIPFVSFESAVTVEDDEEDDWSGGDDKSPEKVTPELSDKNNNNC  
NDNSFNNSKPELTKKEATSTDQIESSDTPEDNQQTTPDGKTLKPKTKILPCPRCKSMET  
KFCYNNYNINQPRHFCKACQRYWTAGGTMRNVVPVGAGRRKNKSSSSHYRHITISEALEA  
ARLDPGLQANTRVLSFGLAQQQHVAAPMTPVMKLQEDQKVSNGARNRFHGLADQRLVAR  
VENGGDCSSGSSVTTSNNHVSDESRAQSGSVVEAQMNNNNNNNMNGYACIPGVPWPYTW  
PAMPPPFGYPPPGYPMPFYWTIPMLPPHQSSPISQKCSNTNSPTLGKHPRDEGSSKK  
DNETERKQKAGCVLVPKTLRIDDPNEAAKSSIWTTLGKNEAMCKAGGMFKGFDHKTMY  
NNDKAENSPVLSANPAALSRSHNFHEQI

>AtOBP1

MPTSDSGEPRRIAMKPNGVTVPISDQQEQLPCPRCDSSNTKFCYNNYNFSQPRHFCKAC  
RRYWTHGGTLRDVPVGGGTRKSAKRSRTCSNSSSSVSGVVSNSNGVPLQTTPLFPQSS  
ISNGVTHVTVESDGKGSALSLSGFTSTLLNHNAATATHGSGSVIGIGGFGIGLGSFDF  
DVSFGLGRAMWPFSTVGTATTTNVSNGGHHAVPMPATWQFEGLESNAGGGFVSGEYFAW  
PDLSITTPGNSLK

>AtOBP3

MVFSSLPVNQFDSQNWQQQGNQHOLECVTTDQNPNNYLRQLSSPPTSQVAGSSQARVNSM

VERARIAKVPLPEAALNCPRCDSTNTKFCYFNNSLTQPRHFCKTCRRYWTRGGSLRNVP  
VGGGFRRNKRKSRKSTVVVSTDNTTSTSSLTSRPSYSNPSKFHSYGQIPEFNSNLPIL  
PPLQSLGDYNSNTGLDFGGTQISNMISGMSSSGGILDWRIPPSQQAQQFPFLINTTGL  
VQSSNALYPLLEGGVSATQTRNVKAEENDQDRGRDGDGVNLSRNFLGNININSGRNEEY  
TSWGGNSSWTGFTSNNSTGHLSF

>AtDAG1

MDATKWTQGFQEMINVKPMEQMISSTNNNTPQQOPTFIATNTRPNATASNGGSGGNTNNT  
ATMETRKARPQEKVNCPRCNSNTNTKFCYNNNSLTQPRYFCKGCRRYWTEGGSLRNVPVG  
GSSRKNKRSSTPLASPSNPKLPDLNPPILFSSQIPNKSNDLNLLSFPVMQDHHHHALEL  
LRSNGVSSRGMNTFLPGQMMSDNSVLYSSLGFTMPDYKQSNNNLSFSIDHHQGIGHNTI  
NSNQRAQDNNDDMNGASRVLPFSDMKELSSTTQEKSHGNNTYWNGMFSNTGGSSW

>AtCDF2

MADPAIKLFGKTIPLPELGVVDSSSSYTGLTETQIPVRLSDSCTGDDDEEMGDSGLGR  
EEGDDVGDGGGESETDKKEEKDSECQEEESLRNESNDVTTTTSGITEKTETTAAKTNEES  
GGTACSQEGKLLKPKDILPCPRCNSMETKFCYNNYNNVNQPRHFCKKCQRYWTAGGTMRN  
VPVAGARRKNKSPASHYNRHVSITSAEAMQKVARTDLQHPNGANLLTFGSDSVLCESMAS  
GLNLVEKSLKLTQTVLQEPNEGLKITVPLNQTNEEAGTVSPLPKVPCFPGPPTWPYAWN  
GVSWTILPFYPPPAYWSCPGVSPGAWNSFTWMPQPNSPSGSNPNSPTLGKHSRDENAAEP  
GTAFDETESLGREKSKPERCLWVPKTLRIDDPEEAAKSSIWETLGIKKDENADTFGAFRS  
STKEKSSLSEGRLPGRRPELQANPAALSRSANFHES

>AtCDF1

MLETKDPAIKLFGMKIPFPTVLEVADEEEEKNQNKTLTDQSEKDKTLKKPTKILPCPRCN  
SMETKFCYNNYNNVNQPRHFCKACQRYWTSGGTMRSVPIGARRKNKNNSPTSHYHHVTI  
SETNGPVLSFSLGDDQKVSSNRFNGNQLVARIENNDERSNNNTSNGLNCFPGVSWPYTWN  
PAFYVPYYPYWSMPVLSSPVSSSPTSTLGKHSRDEDETVKQKQRNGSVLVPKTLRIDDPNE  
AAKSSIWTTLGIKNEVMFNGFGSKKEV/KLSNKEETETSLVLCANPAALSRSINFHEQM

>AtDof5.8

MPSEFSESRRVPKIPHGQGGVAIPTDQQEQLSCPRCESTNTKFCYNNYNNFSQPRHFCK  
SCRRYWTHGGTLRDIPVGGVSRKSSKRSRTYSSAATTSVVGSRNFPLQATPVLPQSSSN  
GGITTAKGSASSFYGGFSSLINYNAAVSRNGPGGGFNGPDAFGLGLGHGSYEDVRYGQG  
ITVWPFSSGATDAATTTSHIAQIPATWQFEGQESKVGFSVSGDYVA

>AtOBP2

MGGMAERARQANIPPLAGPLKPCPRCDSSNTKFCYNNYNNLTQPRHFCKGCRRYWWTQGGA  
LRNVPVGGCRRNKKKGNLSSSSSSKQSSSVNAQSPSSGQLRTNHQFPFSPTLYNL  
TQLGGIGLNLAATNGNNQAHQIGSSLMMSDLGFLHGRNTSTPMTGNIHENNNNNNNENNL  
MASVGLSPFALFDPPTGLYAFQNDGNIGNNVGISGSSTSMVDSRVYQTPPVKMEEQPNL  
ANLSRPVSGLTSPGNQTNQYFWPGSDFSGPSNDLL

>AtOBP4

MQDIHDFSMNGVGGGGGGGRRFFGGGIGGGGGGDRRMRAHQNNILNHHQSLKPCPRCNSLN  
TKFCYNNYNNLSQPRHFCKNCRRYWTKGGVLRNVPVGGGCRKAKRSKTKQVPSSSSADKP  
TTTQDDHHVEEKSSGSHSSSESSLTASNSTTVAASVTAEEVASSVIPGDFMNMKI  
YNGNIEWSTLLGQGSSAGGVFSEIGGFPAVSAIETTPFGFGGKFNQDDHLKLEGETVQQ  
QQFGDRTAQVEFQGRSSDPNMGFEPLDWGSGGGDQTLFDLTSTVDHAYWSQSQWTSSDQD  
QSGLYLP

>FaDof2

MFTAPVLEQMLQCQSQGPLIMNSQKPSWKPHVEIAPNCPRCASSNTKFCYYNNYSLSQPR  
YFCKGCRRYWTKGGSLRNVPVGGGCRKNRRRSARLSQADRISMSYYRRDSSSSSGDDL  
EQHSKEGANGSDIDMAAVFANFLNQNSSNGHDPNLVGSSEIPDDVHDANALSDHSQNSSN  
PAEDLLESVELLQGLVLPDHDLQQSHEEDNIHNVMGNHQSHQDLSIHEFGLQGLLDEDEV  
FWSDTTASLTSNTTSFNWQELDNSFSPDDDDHMKISTTTTNLCSENWSSFDGSLGVFSG

>OsDof3

MAPAAGDDAVVPRKGAGGGGTTTTPPPPPPAQQQQQQLPPPPPQEQGLRCPRCDSPNTKF  
CYNNYSLSQPRHFCKTCRRYWTKGGALRNVPVGGGCRKNKRSRASAASRLSLNLPTVE  
GIGGAAADPAAAAAARLFLGGGTTMMMSSTSPGGAAAADVFQQGGAVGMLPLPRLQ  
SPAGGGVGHQYVPGFGEWPSGDIAGGNAVNGGGGHGAVSSTIASSIESLSFINQDLHWKL  
QQQLATMFLGPPGSASAAAAAQANDGGGNGAQATASGHAAGGGGAFMHMAGSVPSME  
AAMPSATSWFMDSCSYGLPSPPPATAVAVAATTSSNLNSGGRSSGGDDNATSNCGSAIPA  
WGDISTFAMLP\*

>OsDof12

MGECKVGGGGGGDCLIKLFGKTI PVPEPGACAAGDVKDLQHSGSSTTEPKTQENTVQD  
STSPPPQPEVVDTESSADKNSENQQQQGDTANQKEKLPKPKILPCPRCSSMDTKFCY  
YNNYNINQPRHFCKNCQRYWTAGGAMRNVPVAGARRKSKVSAASHFLQVRRAALPGDPP  
LYAPVKTNGTVLSFGSDLSTDLTEQMKHLKDKFIPTTGIKNTDEMPVGLCAEGLSKTEE  
SNQTNLKEKVSADSPNVAQHPCMNNGGAMWPFVAPPPAYTSSIAIPFYAAAAVAAY  
WGCMVPGAWNAPWPPQSQSQSVSSSSAASPVSTMTNCFRLGKHPRDGEELDSKNGKVM  
VPKTVRIDDVDEVARSSISLIGIKGDKVGADHGRGCKLAKVFESKDEAKASTHTAISSL  
PFMQGNPAALTRSVTFQEGS\*

>MaDof23

MCYPWIAAPKFFLWGCGCCQDIGLVKSMEMVASSSSTVTTTTATASSTFSAARPQVTERR  
IRPQKEQALHCPRCNSTNTKFCYYNNYSLTQPRYFCKTCRRYWTDGGSLRNVPVGGGSRK  
NKRPSLSSAAATTSATSATTSSTAATSSIKFHDGQDLNLAFFHHGLPDNPCNAV GALSAM  
ELLRSGMTMRGLSPFVTMPLPEYPTGFELQEFRAPALNFPMEAIAGGEGREGSSGGYGAL  
QGVQESAGGRLLPFEDVKPVVHTSTAAEFENSRGHGGHPPGFWNGMIGGGGSW

>MaDof24

MSELGDAAIKLFKII TLQNSTPEERPSDAGGWKEKAARKPEKILPCPRCRSSDTKFCYY  
NNYNVNQPRHFCRNCQRYWTAGGAMRNVPVAGARRKNRNTSHDRHVLRFGSEAAGNIGD  
EQSSKESEGTASVPVPFYPVAEWSCTVPPGAWSTPWLSPESSSPESSSPTIRKRSRMD  
DPEEAARSSVLKAFQRKVDVKDHGMEAPLLLHVNPAAALSRLSFQESSKRSAAVGERRSG  
LY

>MaDof25

MQIFMESSDWLKS VVREDGGMDFSSTPGELLSCSRLPVGDRRLRPQQEQAKCPRCDSTHT  
KFCYYNNYSLSQPRYFCKACRRYWTKGGALRNVPVGGGCRKNKRPAAKAAEPHRQPAFS  
LPGATDLQSSFNQAQPQQFSLTEIPGNL NFAECKYDSELGSFSSGLHPMRTKYGAMQGS  
SQSFV FVSEGDIGLVATQGFPSDDNTREVFMDGSHAVLMQACQRIEDPFGQNRNTNTEF  
LRLGRNSGVQMVDVTQWGTP T ASDHGPE

>RcDof3

MSEPKDPAIKLFGKMIPPEISTSTAAAASATTCSADDDCQDRERPSCASSSLEEGDTTG  
DGEERESDKDAEGETLAESKQENGSESSNPDSISGITENPKTSSVEKDDTSKTSKTEE

QSDTSNSQEKTPKKPKILPCPRCNSMDTKFCYNNYNNVNQPRHFCKNCQRYWTAGGTMR  
NVPVGAGRRKNKNSASHYRHITVSEALQNVQNDIPNGIHHHPALKSNGTFLTFGSDTPLHE  
SVASALNLADKTVQNCTRNGFHKPEALRIPVSYAGVEHGDASHKGLATASNSKDEASKS  
GPQATVIQNCQGFPQPICYPGTPWPYPWNSAQWSSPVPTAFCPPGFPMPFYPTTAYWG  
CTVPGTWNMSWIPQPPSPNETASTSGPNSPTLGKHSRDDNMLKPSNSGETPEKEKSAERC  
LWIPKTLRIDDPGEAAKSSIWTTLGKINDRPSIGGRGLFKAFESKGNKHAETSSVL  
QANPAALSRSLSKFRESS

>RcDof4

MMSNNLQGGKQATNKEDNQSSGNRKSTASARPQEQALKCPRCDSPNTKFCYNNYSLTQP  
RHFCKTCRRYWTGKGALRNVPVGGGCRKNKMKSSSRLSGDSKSSGSSEIGGKFFHGI  
SPAMDFNLGGLSFPRLSPSSGGLYNQFSSFGDMSATSAVAASVTNPCFNLDPSGSSPVG  
SLMGFSYPISVTSGFSGAIQDVGTGGGGSGSMNVHTNLASSIESLSTINQDLHWKLQQQ  
RLAMLFGGDDHKDNSVSSLAVENQAQKPQILFQNLKPEVSGVGNRKEADTATEWF  
FGNSYRQVNPTPTNSNSNGNDNTAGASNWNGVQAWGDLHQYNGLP

>RcDof5

MDRGWKPNVEISPNPCRCGSSNTKFCYNNYSLTQPRYFCKGCRRYWTGGSRLNVPVGG  
GCRKNRRGKSLRLSSTDVAQSKSLGYGGVTADSTRHVHGYKGINPSIESCSSSTRSNGSH  
IDLALVYANFLNPQQPDKTASSGFEMQELGSDHFDPSLDFSGISNVNLDSTTVQLHDIG  
DHNFAGCIPAISDSSMGDPPSDNHQLMHYCGVDSSSKHKQEANDHKIPQCTSITHDPINY  
GLPPLPGEEIGSQEILWPSSHMEHSHTLQVTQQQAVLGPDQTQDPNTLLFGNWSFPDLS  
SDDAFSRS

>RcDof6

MIQELLGGAGLIGGETKISIAGTILEGTPSHSPSLSPSSSTTTTSATAATATATTTTANS  
TTSSTSENLRPCRDSSNTKFCYNNYNNLTQPRHFCKTCRRYWTGKGALRNVPVGGGCRK  
NKNTVVSASVAKSSNNKMTMVSEIGRSSFGNVFDHELPSSSPIMWASPHNSHLLTLRA  
NHNPNPNSTTLSNSLGVKEETGCMIGTQMMMAETTATGALNARTLGMDHLSQVPSLGLCS  
PFWKNSQNQAQHHQQNGFIVGEAQNSGIQELYQLRSSTNTYYTDNSSVLSNVGSSSTS  
SSNILESSPVAGGELGYWNPTFSWSDLPTTNGAYP

>MdDof3

MFIAPSVKQILQCPPSGQEQFMMMEMKTPWNKSHIEIAPNCPRCASSNTK  
FCYNNYSLSQPRYFCKGCRRYWTGGSRLNVPVGGGCRKNRRGKAARLS  
QADRGSLSYFQHNSSTTTEDDLAGNTQPGGSNVPDIDLAVVFAKFLNHN  
STTPDGDHDPNLVISSALNDRDGSNSKAADDLVEAVGHYHLLLEGHQ  
SQEENVQTFMGINHNDMMNIHEFELQGLLDDEQVVDVFWSDDATTSLT  
SSTASFTWQPMMDLQELDCSLPDDDDQMKISTNLCGDNWSSFEFSGFEVF  
SRS

>VvDof3

MQDPSTFQPMKTHFPEQEHLKCPRESTNTKFCYNNYNNLSQPRHFCKNCRRYWTGKGAL  
RNIPVGGSRKNTKRSSNPKRPSSSSSTSSVSSPPVSSTSNAQAQKSEPSGIYVTAADQD  
RRMLDISGSFSSLLASNGQFGSLLESNPTGVRGVPLSAFSETPNSDSGRTPAMELQSN  
GNSESFLGIQTGDSNCWNGGNGWPDLAITYPGSTFQ

>MdDof9

MQSFHSFAPQEYFANKFPYNLSLKTQDPQRRVNQKTKMIQELFGGAGLNN

IAGGGERKSLSLHGGTTPSPSLSSSPSPSCSTTTTATTTTTTGLSNTENL  
RCPRCDSSNTKFCYNNYNLTQPRHFCKTCRRYWTKGGALRNVPIGGGCR  
KNKSVTVSTASIGKTAAGLKTVVSEIGRSLGGGFEQEVQASPIQWGS  
QNSHILALLRSSHQPNPNQLCNSVNVKEEGMNNMIGSRMMTTEPAAMS  
TARTLGLDPVCEAPSLGLCSSFWRNNNNQNPSPSHHQQNGFIVGHEVQS  
SNIGIQELFQRLRSTTSQSGSYSDHLNNVVMSSSSSSLSSTSSILDS  
APVVGGMGYWNPFAFTAWSSDLPTTNGAYH

>MdDof15

MLSNCDEHEKMALLISSTTNEWPQLQQDIQIDDIHHQKGLNNNNNNNRSS  
TSSPANRVMKPGQEQQLQQLQALKPCPRCDSSNTKFCYNNYSLSQPRHF  
CKACKRYWTRGGTLRNVVGGGCRKNKRKVPKPGSTSTSSAMDGGATSS  
SSVPSTTAAANNNSNPNSQPSHIDQINPLFYGLSSNPFMDTASGFDLHQL  
NHHAQLGLGFSSSGTNMSSDNYNRNFNPASSSSLPSNYSSMFSASPST  
TVPTMASVLASKFINGGAFKDIQARGPHQQNQYFQSLLPFEDLQIAAGNN  
GEVGGAAKDVKVEDHNGQNRLQWNNNNGSSNVNGNMNCQNQISEQMGLSD  
PTPYWNSSTLGSNWHPANLGSVSSLI

>MdDof18

MLETKDPAIKLFGKIALPADIEDLGFARPVEKEVEVESEEEDEEEDEE  
TEQDSPSRKSTESIEQDDGSPPKTEDPANLEILPDSNVNPKTPSTDEASA  
LSKTAQTEKEPSTENSEEKALKKPKILPCPRCNSMDTKFCYNNYNVNQ  
PRHFCKACQRYWTAGGTMNRNVPVAGARRKNKNSASHYRHFTITEALQAAR  
IDAPNGAHPALKSNGRVLSFGVDVPICDPMASVLNLADKNVSSSTRNGL  
HKGEEQVFRAPCKSRENGDDSSASSVNVSKPHLVNVNGFSSQIPCLPGV  
PWPYPWNAAVPPAFCPGFLSFAAPYWNCGVPGTWNVPWFQGPATP  
NQKSPHSSNSPTLGKHSRDEDVVRPENLEKEEPSRQKNGCVLVPKTLRI  
DDPSEAAKSSIWATLGKINDSISGKGLFAFQPKSDQKKTVPETSPAMRA  
NPAALSRSLNHFESS

>BnCDF1

MLESKDPAIKLFGMKIPLSSTVFEAEYELSAEQNQNETLTDQSDKEKNLKKPTKILPCPRCNSMETKFC  
YNNYNVNQPRHFCKACQRYWTSGGTMRNVPVAGARRKNKNSSSHYRHVTINETNGPVLFSNLR  
DDHKTLEKNNHQVDNSRTRNNEMNGLRCIPGVSWPYTWNHGFYPVYPYWNVPMVSSSPYSTPN  
STLGKHSREEDETIKRKQMNGSVLVPKTLRIDDPNEAAKSSIWTTLGKINEVMFKGFDSKKEVSINKEET  
ETSLVLCANPAALSRSVNFHEQM

>CIDof3

MGIDYCGFDDQFAGGGVVVKQMEGGGSSSSKPNNNNNNNNNNGNLLERKARPQKEQALN  
CPRCNSTNTKFCYNNYSLSQPRYFCKACRRYWTEGGSLRNVVGGGSRKNKRSSLSSA  
DKKINASDQNPKIIHHAHQDLNLAIFPPNNNNNNNTPIPSSTSTSSSSHLLGSFMTAAP  
AAGVFNGGGGFLSELKPSLSFSLEGFENGGGYDLHHNHHHHHHHHHHHQDQTAVMFP  
MEELKQSNRGEFEENRGGGGHGAGDNNSGGGFWNGMLGGGSW

>CIDof20

MVFPSPSNYLDPTTTHQWHQQTASQQSGSSSFQLAGSPAPPQVRPVSMADRARMANLPV  
PETALKCPRCESTNTKFCYFNYSLSQPRHFCKTCRRYWTRGGALRSVPVGGGYRRNTRK  
TKSTSKSPVNSQCQPTTTEVSGGEAMRLNYNNAISTQNEGAVDSTHHPIGIANFLGFDQI  
QWRPQLQLHQTTQSPLLVNSARLLGNGGIEASPSYSIVRQIQKKMEATTKMEEDGQQVEM

NVAKPFWGVVGGSDHRHYWSGFNPSSSSHS

>SITDDF1

MVVDsvrNSFDLLCGARTKPVXFLSIDQINLEGEVTQSKQVDELVDPAADSSIEPETSSGISDDIKMQD  
ADKETLSSKSVEEEDSSEEKALKKPKLIPCPRCNSMETKFCYNNYNVNQPRYFCKNCQRYWTAGG  
TMRNVPVVGSGRRKNKSSSISNYPLQAGRVEAAAHGMLPASRTNGTVLTFGSDKPLCDSMVSALNL  
AENSHNMHRNEYHGSEQRMP TIGNDQSN GSCSTASSVTDKESSAGTHDLANWSNFQPFPPQVPY  
FQGAPWPYSGFPVSFYPAAPYWGCTVSNPWNVPWLSSNQSVHNN SPTSPTLGKHSRDESKLDPSQ  
SRRRD TTLQDREGERCVLIPKTLRIHDPNEAAKSSIWSTLGIRNEKIDSTRGTMLFSAFNPKADHRNREL  
DTSFALQANPAALSDHFIFVRVHDXYKTYNMIHGCLVPIIHVKSLAKCR  
IKLHTIDL CGXGPSSDPAHSRFLCLGGEGDSMHSVYKVL\*

>CrDof1

MVDGGSRAASGQLDDWAAGVAADLDQGEGRAGARRRPARDASPAPDARKVTTFTNKKRPASD  
RDSSPEEDDEEQAQKGLKADGTRPKLPRPDKKEACPRCNSMDTKFCYNNYNINIKQPRFYCKTCQRY  
WTAGGTLRNIAPGSGR
