# Supplementary material for: Emerging Roles of Plant DNA-Binding With One Finger Transcription Factors in Various Hormone and Stress Signaling Pathways
Source: PubMed Central journal article supplement (PMC9165642; doi:10.3389/fpls.2022.844201), 2022-05-13
Supplement: Table_1.pdf [file Table_1.pdf]

**Table S1. Abiotic/biotic stress response studied in transgenic plants overexpressing Dofs**

CDF, Cycling Dof Factors; TDDF1, Tomato Dof Daily Fluctuations 1, OBP, OBF Binding Protein.

| Gene                        | Transgenic Plants           | Effect                                                                 | Reference                  |
|-----------------------------|-----------------------------|------------------------------------------------------------------------|----------------------------|
| <i>AtCDF3<sup>a</sup></i>   | <i>Arabidopsis</i>          | Drought and cold tolerance                                             | Corrales et al. (2017)     |
| <i>AtOBP2</i>               | <i>Arabidopsis</i>          | Defense                                                                | Skirycz et al. (2006)      |
| <i>GhDof1<sup>a</sup></i>   | <i>Gossypium hirsutum</i>   | Salt and cold tolerance                                                | Su et al. (2017)           |
| <i>MdDof54<sup>a</sup></i>  | <i>Malus domestica</i>      | Drought tolerance                                                      | Chen et al. (2020)         |
| <i>MtDof32</i>              | <i>Medicago truncatula</i>  | Osmotic and salt tolerance                                             | Guo et al. (2021)          |
| <i>OsDof1</i>               | <i>Oryza sativa</i> ;       | Wound-responsive                                                       | Park et al. (2014)         |
| <i>OsDof15<sup>a</sup></i>  | <i>Oryza sativa</i>         | Salt tolerance                                                         | Qin et al. (2019)          |
| <i>OsDof24<sup>a</sup></i>  | <i>Oryza sativa</i>         | Delays leaf senescence                                                 | Shim et al. (2019)         |
| <i>SlCDF3<sup>a</sup></i>   | <i>Solanum lycopersicum</i> | Salt tolerance                                                         | Renau-Morata et al. (2017) |
| <i>TDDF1<sup>a</sup></i>    | <i>Solanum lycopersicum</i> | Salt and drought tolerance;<br>Resistance to phytophthora<br>infestans | Ewas et al. (2017)         |
| <i>StCDF1<sup>a</sup></i>   | <i>Solanum tuberosum</i>    | Drought tolerance                                                      | Ramirez et al. (2021)      |
| <i>ThDof1.4<sup>a</sup></i> | <i>Tamarix hispida</i>      | Salt and drought tolerance                                             | Zang et al. (2017)         |
| <i>VaDof17d<sup>a</sup></i> | <i>Vitis vinifera</i>       | Cold tolerance                                                         | Zhu et al. (2021)          |

<sup>a</sup>Dofs described as capable of binding to (T/A)AAAG.**Reference**

- Chen, P., Yan, M., Li, L., He, J., Zhou, S., Li, Z., Niu, C., Bao, C., Zhi, F., Ma, F., Guan, Q. (2020). The apple DNA-binding one zinc-finger protein MdDof54 promotes drought resistance. *Hortic Res* 7 (1):195. doi:10.1038/s41438-020-00419-5
- Corrales, AR., Carrillo, L., Lasiera, P., Nebauer, SG., Dominguez-Figueroa, J., Renau-Morata, B., Pollmann, S., Granell, A., Molina, RV., Vicente-Carbajosa, J., Medina, J. (2017). Multifaceted role of cycling DOF factor 3 (CDF3) in the regulation of flowering time and abiotic stress responses in *Arabidopsis*. *Plant Cell Environ* 40 (5):748-764. doi:10.1111/pce.12894
- Ewas, M., Khames, E., Ziaf, K., Shahzad, R., Nishawy, E., Ali, F., Subthain, H., Amar, MH., Ayaad, M., Ghaly, O., Luo, J. (2017). The Tomato DOF Daily Fluctuations 1, TDDF1 acts as flowering accelerator and protector against various stresses. *Sci Rep* 7 (1):10299. doi:10.1038/s41598-017-10399-7
- Guo, T., Wang, S., Zhang, T., Xu, L., Li, Y., Chao, Y., Han, L. (2021). Expression of the *Medicago truncatula* MtDof32 transcription factor regulates plant growth and enhances abiotic stress tolerances in transgenic *Arabidopsis*. *Environmental and Experimental Botany* 183. doi:10.1016/j.envexpbot.2020.104339
- Park, SH., Lim, H., Hyun, SJ., Yun, D-W., Yoon, U-H., Ji, H., Kim, T-H., Eun, M-Y., Kim, Y-H., Lee, G-S. (2014). Wound-inducible expression of the *OsDof1* gene promoter in a Ds insertion mutant and transgenic plants. *Plant Biotechnology Reports* 8 (4):305-313. doi:10.1007/s11816-014-0316-5
- Qin, H., Wang, J., Chen, X., Wang, F., Peng, P., Zhou, Y., Miao, Y., Zhang, Y., Gao, Y., Qi, Y., Zhou, J., Huang, R. (2019). Rice OsDOF15 contributes to ethylene-inhibited primary root elongation under salt stress. *The New phytologist* 223 (2):798-813. doi:10.1111/nph.15824
- Ramirez, GL., Shi, L., Bergonzi, SB., Oortwijn, M., Franco-Zorrilla, JM., Solano-Tavira, R., Visser, RGF., Abelenda, JA., Bachem, CWB. (2021). Potato CYCLING DOF FACTOR 1 and its lncRNA counterpart StFLORE link tuber development and drought response. *Plant J* 105 (4):855-869. doi:10.1111/tpj.15093
- Renau-Morata, B., Molina, RV., Carrillo, L., Cebolla-Cornejo, J., Sanchez-Perales, M., Pollmann, S., Dominguez-Figueroa, J., Corrales, AR., Flexas, J., Vicente-Carbajosa, J., Medina, J., Nebauer, SG. (2017). Ectopic Expression of CDF3 Genes in

Tomato Enhances Biomass Production and Yield under Salinity Stress Conditions. *Front Plant Sci* 8:660. doi:10.3389/fpls.2017.00660

- Shim, Y., Kang, K., An, G., Paek, N-C. (2019). Rice DNA-Binding One Zinc Finger 24 (OsDOF24) Delays Leaf Senescence in a Jasmonate-Mediated Pathway. *Plant and Cell Physiology* 60 (9):2065-2076. doi:10.1093/pcp/pcz105
- Skirycz, A., Reichelt, M., Burow, M., Birkemeyer, C., Rolcik, J., Kopka, J., Zanon, MI., Gershenzon, J., Strnad, M., Szopa, J., Mueller-Roeber, B., Witt, I. (2006). DOF transcription factor AtDof1.1 (OBP2) is part of a regulatory network controlling glucosinolate biosynthesis in Arabidopsis. *Plant J* 47 (1):10-24. doi:10.1111/j.1365-313X.2006.02767.x
- Su, Y., Liang, W., Liu, Z., Wang, Y., Zhao, Y., Ijaz, B., Hua, J. (2017). Overexpression of GhDof1 improved salt and cold tolerance and seed oil content in *Gossypium hirsutum*. *Journal of plant physiology* 218:222-234. doi:10.1016/j.jplph.2017.07.017
- Zang, D., Wang, L., Zhang, Y., Zhao, H., Wang, Y. (2017). ThDof1.4 and ThZFP1 constitute a transcriptional regulatory cascade involved in salt or osmotic stress in *Tamarix hispida*. *Plant Mol Biol* 94 (4-5):495-507. doi:10.1007/s11103-017-0620-x
- Zhu, X., Hong, X., Liu, X., Li, S., Yang, J., Wang, F., Yue, Y., Zhang, N., Si, H. (2021). Calcium-dependent protein kinase 32 gene maintains photosynthesis and tolerance of potato in response to salt stress. *Scientia Horticulturae* 285. doi:10.1016/j.scienta.2021.110179
